# Supplementary material for: Metal–organic framework deposition on dealloyed substrates
Source: Royal Society of Chemistry journal article supplement (doi:10.1039/c5ta02092a), 2015-01-01
Supplement: c5ta02092a1.pdf [file c5ta02092a1.pdf]

Electronic Supplementary Information for

# Metal-Organic Frameworks deposition on dealloyed substrates

Nicolò Campagnol,<sup>a</sup> Ivo Stassen,<sup>b</sup> Koen Binnemans,<sup>c</sup> Dirk E. De Vos,<sup>b</sup>  
and Jan Fransaer<sup>a</sup>

<sup>a</sup>Department of Materials Engineering (MTM), KU Leuven, Kasteelpark Arenberg 44, B-3001 Leuven, Belgium. E-mail: [Jan.Fransaer@mtm.kuleuven.be](mailto:Jan.Fransaer@mtm.kuleuven.be)

<sup>b</sup>Centre for Surface Chemistry and Catalysis (COK), KU Leuven, Kasteelpark Arenberg 23, B-3001 Leuven, Belgium.

<sup>c</sup>Department of Chemistry, KU Leuven, Celestijnenlaan 200F, B-3001 Leuven, Belgium

## Table of contents:

|                                                                                                                                                                                                                                                                                                                                                                                                                                                                                                 |          |
|-------------------------------------------------------------------------------------------------------------------------------------------------------------------------------------------------------------------------------------------------------------------------------------------------------------------------------------------------------------------------------------------------------------------------------------------------------------------------------------------------|----------|
| <i>Figure S1: Phase diagram of the Ag-Cu system (left). SEM image (cross section) of the interphase between dealloyed and non-dealloyed areas in a Ag<sub>15</sub>Cu<sub>85</sub> alloy sample (3 h, 0.15 V cupric solution) (right). In dark grey the copper-rich phases (<math>\alpha</math> and <math>\alpha'</math>), and in white the silver-rich <math>\beta</math> phase. Below, the EDX spectra of a pristine (a) and dealloyed (b) sample (taken from top view SEM pictures) .....</i> | <i>2</i> |
| <i>Figure S2: SEM-FIB images of a dealloyed Ag<sub>30</sub>Cu<sub>70</sub> alloy (a) and a dealloyed Ag<sub>45</sub>Cu<sub>55</sub> alloy (b) (3 h, 0.15 V cupric solution). .....</i>                                                                                                                                                                                                                                                                                                          | <i>2</i> |
| <i>Figure S3: XRD of samples with different elemental composition (Ag<sub>15</sub>Cu<sub>85</sub>, Ag<sub>30</sub>Cu<sub>70</sub>, Ag<sub>45</sub>Cu<sub>55</sub>) (a), XRD patterns of an Ag<sub>15</sub>Cu<sub>85</sub> sample, pristine after cast, dealloyed and deposited with MOF (b). .....</i>                                                                                                                                                                                          | <i>3</i> |
| <i>Figure S4: optical cross-section image of a Ag<sub>15</sub>Cu<sub>85</sub> coating on a copper plates obtained by dip coating (a). Overview of different samples (b). .....</i>                                                                                                                                                                                                                                                                                                              | <i>3</i> |
| <i>Figure S5: SEM-FIB image of electrochemically dealloyed Ag<sub>15</sub>Cu<sub>85</sub> dip-coated sample. ....</i>                                                                                                                                                                                                                                                                                                                                                                           | <i>3</i> |
| <i>Figure S6: comparison between dealloyed layers obtained with samples with different grain orientation, dealloyed under the same conditions. (a) optical cross-section of a dealloyed Ag<sub>15</sub>Cu<sub>85</sub> alloy sample with grains parallel to the surface, (b) uniaxial grains, and (c) perpendicularly oriented ones (3 h, 0.25 vs Ag/AgCl corresponding to 0.15V vs copper, in cupric solution). ....</i>                                                                       | <i>4</i> |
| <i>Figure S7: Detail of the Ag<sub>15</sub>Cu<sub>85</sub> dealloyed sample with crystals oriented parallel to the surface shown in the previous figure. ....</i>                                                                                                                                                                                                                                                                                                                               | <i>4</i> |
| <i>Figure S8: Top view of (a) a dealloyed Ag<sub>15</sub>Cu<sub>85</sub> sample with grains oriented parallel to the surface, (b) a dealloyed dip-coated sample, with vertically oriented grains. ....</i>                                                                                                                                                                                                                                                                                      | <i>4</i> |
| <i>Figure S9: optical cross-section images of a Ag<sub>15</sub>Cu<sub>85</sub> chemically dealloyed for 3 h, 24 h, and 72 h. ....</i>                                                                                                                                                                                                                                                                                                                                                           | <i>5</i> |
| <i>Figure S10: SEM-FIB images of a 24 h chemically dealloyed Ag<sub>15</sub>Cu<sub>85</sub> sample before (a) and after (b) MOF deposition. ....</i>                                                                                                                                                                                                                                                                                                                                            | <i>5</i> |
| <i>Figure S11: SEM-FIB images of a Ag<sub>15</sub>Cu<sub>85</sub> sample dealloyed and deposited with MOF. The sample was scratched in the centre with a diamond pen. ....</i>                                                                                                                                                                                                                                                                                                                  | <i>5</i> |
| <i>Figure S12: SEM-FIB images of a Ag<sub>15</sub>Cu<sub>85</sub> sample dealloyed and deposited with MOF. The sample was scratched in the centre with a diamond pen (more deeply than the precedent sample). ....</i>                                                                                                                                                                                                                                                                          | <i>6</i> |

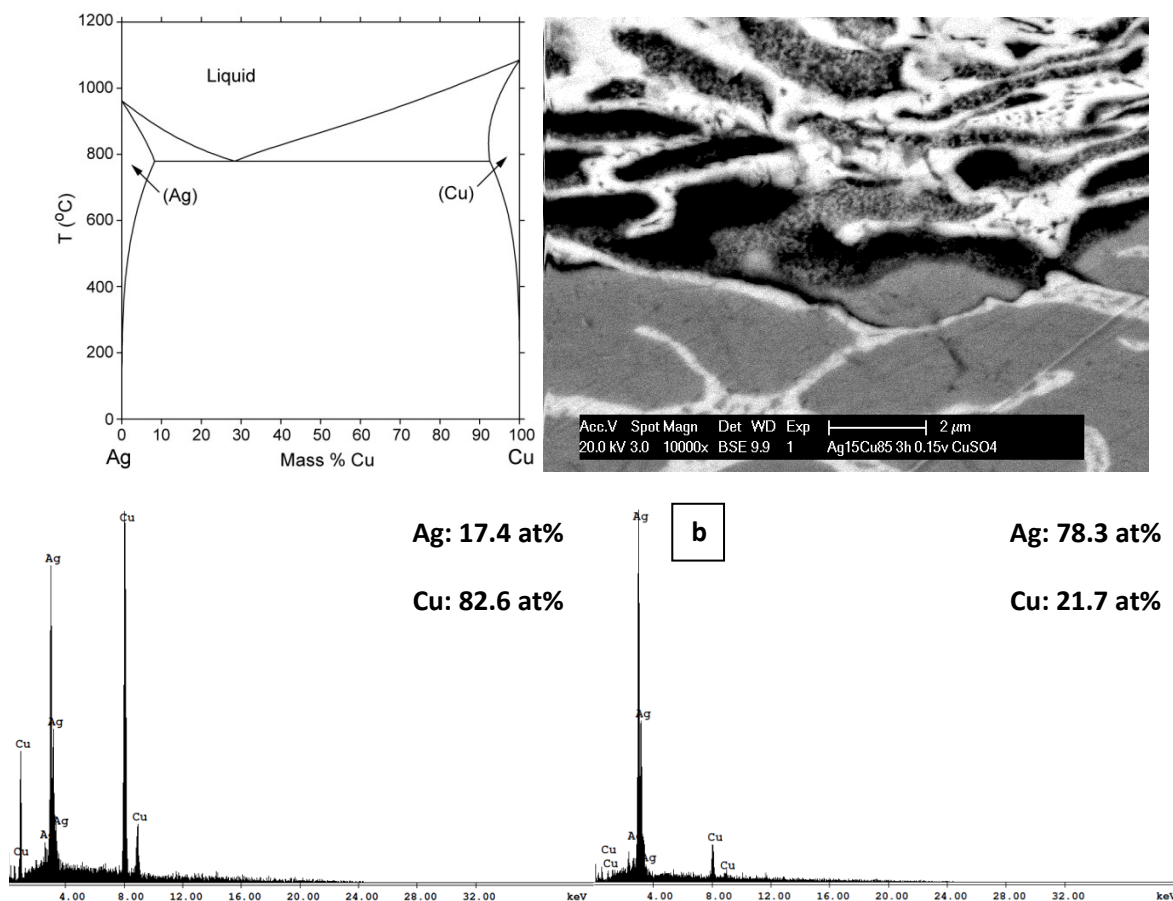

Figure S1: Phase diagram of the Ag-Cu system (left). SEM image (cross section) of the interphase between dealloyed and non-dealloyed areas in a  $\text{Ag}_{15}\text{Cu}_{85}$  alloy sample (3 h, 0.15 V cupric solution) (right). In dark grey the copper-rich phases ( $\alpha$  and  $\alpha'$ ), and in white the silver-rich  $\beta$  phase. Below, the EDX spectra of a pristine (a) and dealloyed (b) sample (taken from top view SEM pictures)

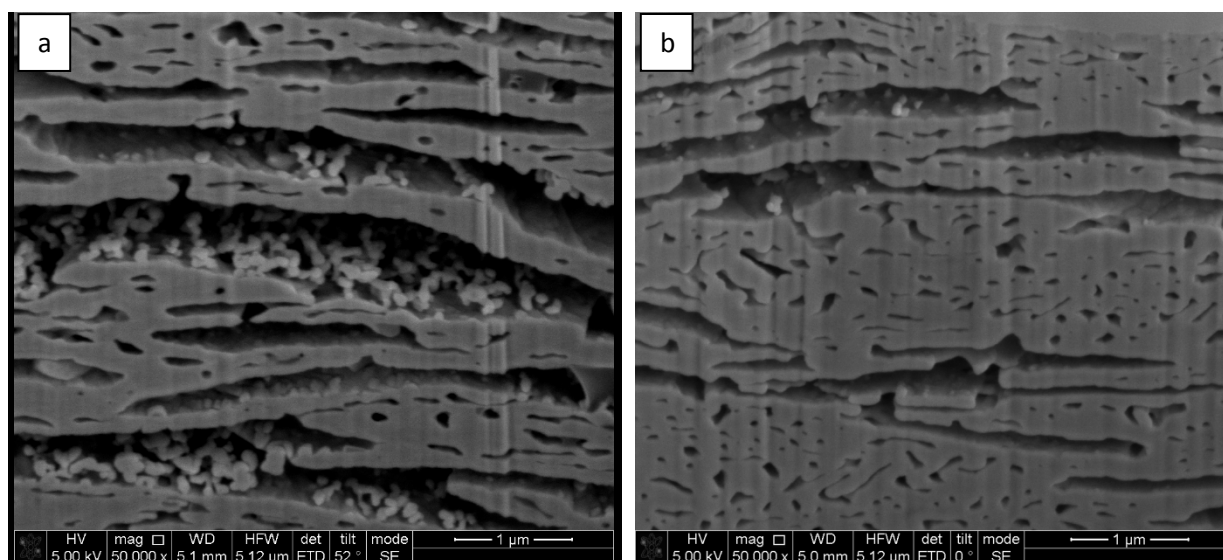

Figure S2: SEM-FIB images of a dealloyed  $\text{Ag}_{30}\text{Cu}_{70}$  alloy (a) and a dealloyed  $\text{Ag}_{45}\text{Cu}_{55}$  alloy (b) (3 h, 0.15 V cupric solution).

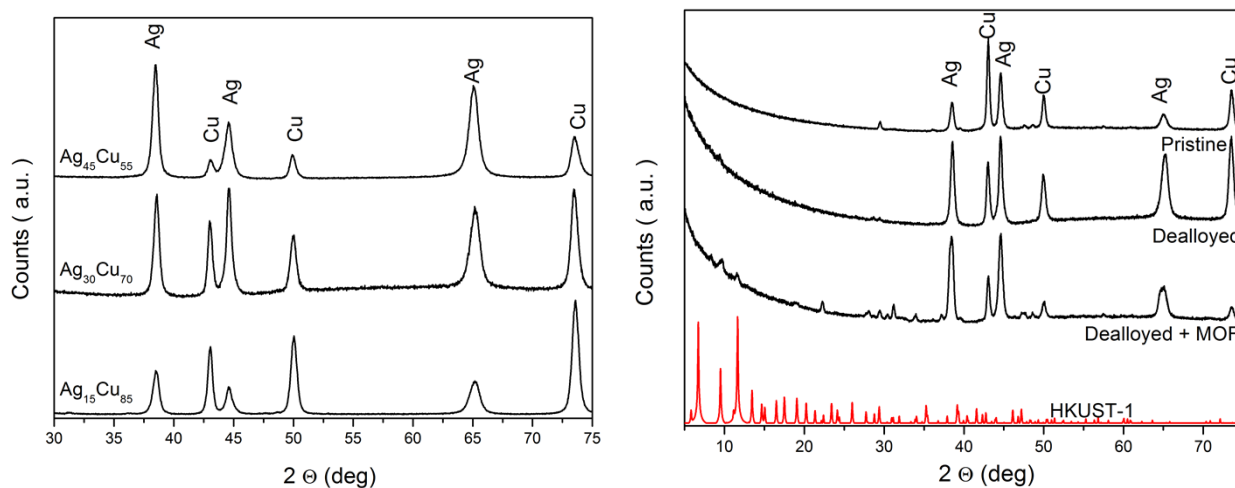

Figure S3: XRD of samples with different elemental composition ( $\text{Ag}_{15}\text{Cu}_{85}$ ,  $\text{Ag}_{30}\text{Cu}_{70}$ ,  $\text{Ag}_{45}\text{Cu}_{55}$ ) (a), XRD patterns of an  $\text{Ag}_{15}\text{Cu}_{85}$  sample, pristine after cast, dealloyed and deposited with MOF (b).

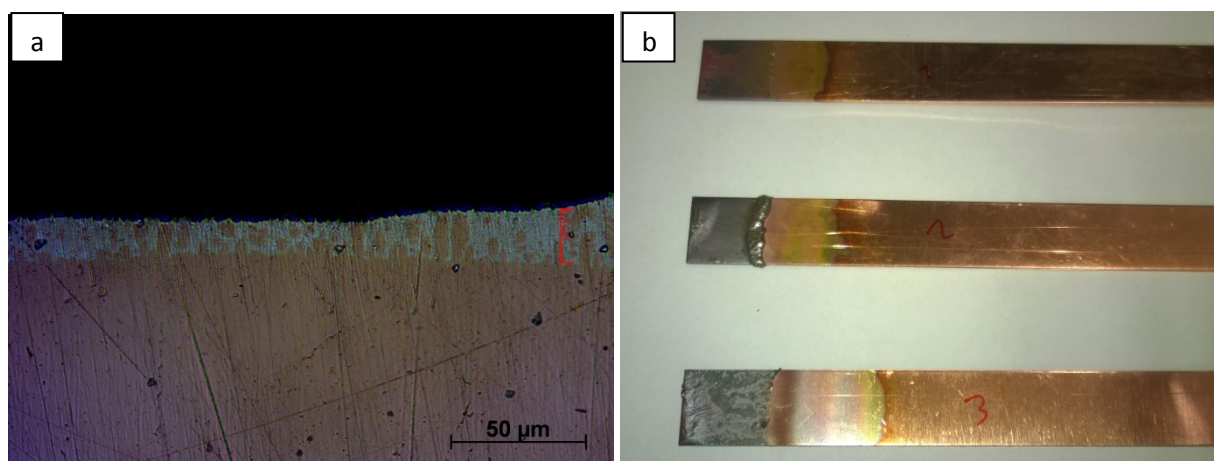

Figure S4: optical cross-section image of a  $\text{Ag}_{15}\text{Cu}_{85}$  coating on a copper plates obtained by dip coating (a). Overview of different samples (b).

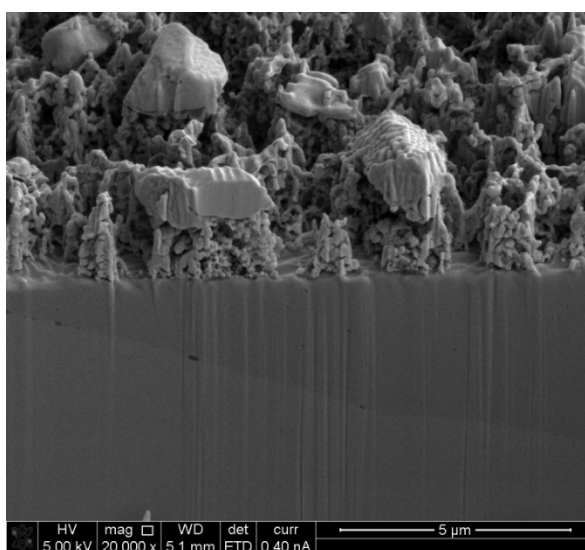

Figure S5: SEM-FIB image of electrochemically dealloyed  $\text{Ag}_{15}\text{Cu}_{85}$  dip-coated sample.



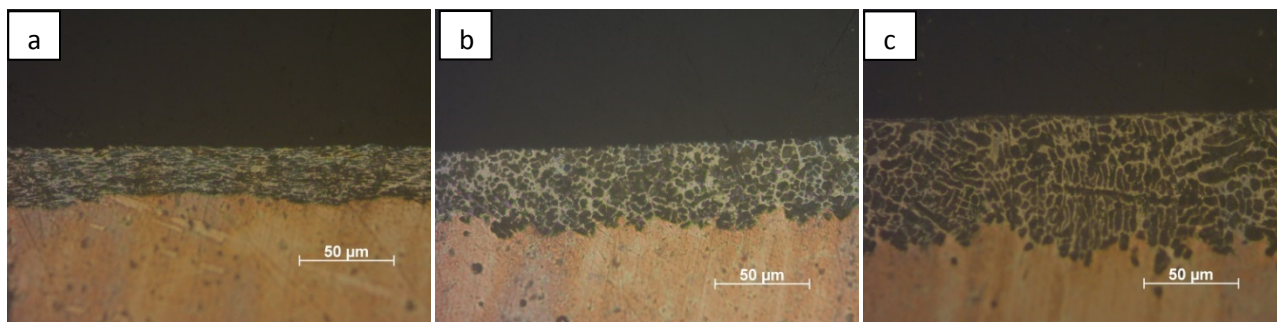

Figure S6: comparison between dealloyed layers obtained with samples with different grain orientation, dealloyed under the same conditions. (a) optical cross-section of a dealloyed  $\text{Ag}_{15}\text{Cu}_{85}$  alloy sample with grains parallel to the surface, (b) uniaxial grains, and (c) perpendicularly oriented ones (3 h, 0.25 vs  $\text{Ag}/\text{AgCl}$  corresponding to 0.15V vs copper, in cupric solution).

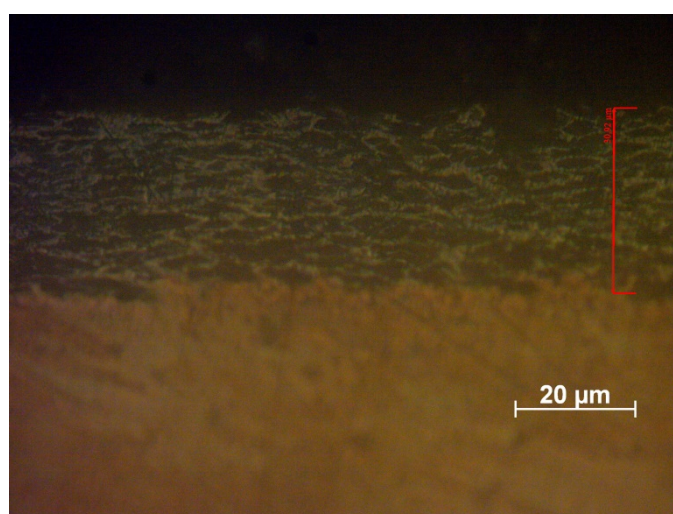

Figure S7: Detail of the  $\text{Ag}_{15}\text{Cu}_{85}$  dealloyed sample with crystals oriented parallel to the surface shown in the previous figure.

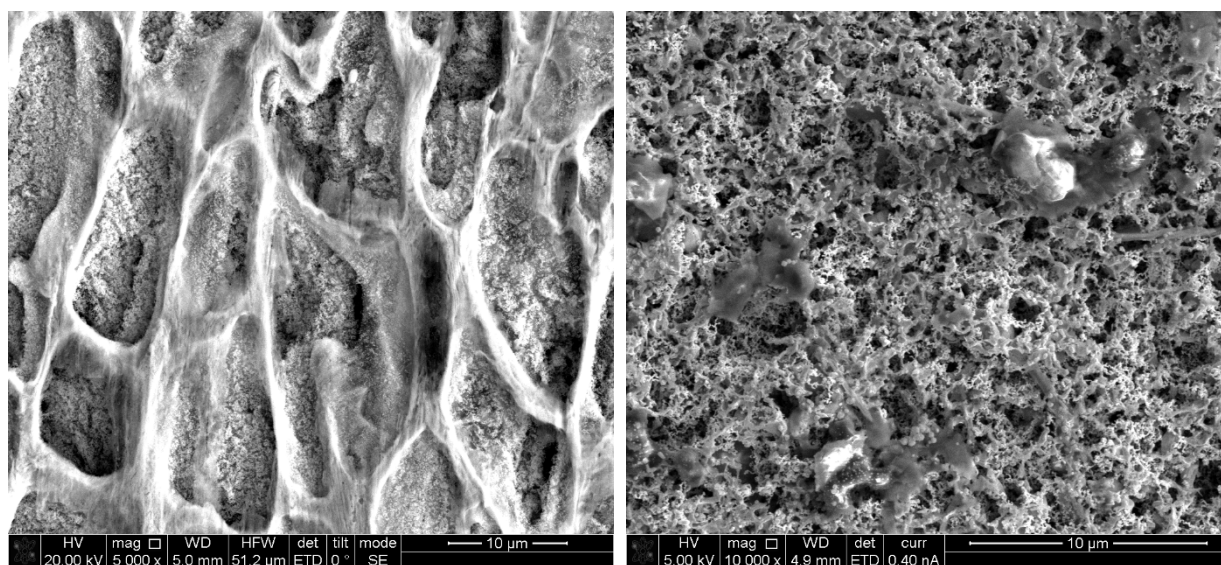

Figure S8: Top view of (a) a dealloyed  $\text{Ag}_{15}\text{Cu}_{85}$  sample with grains oriented parallel to the surface, (b) a dealloyed dip-coated sample, with vertically oriented grains.



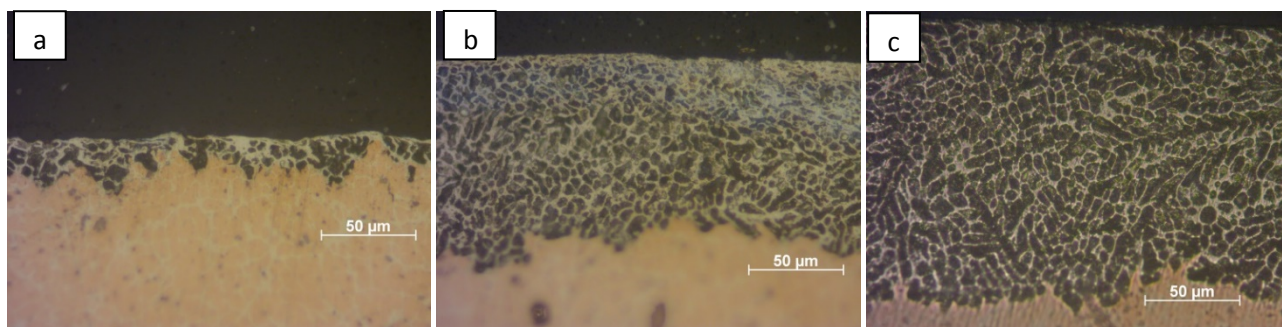

Figure S9: optical cross-section images of a  $\text{Ag}_{15}\text{Cu}_{85}$  chemically dealloyed for 3 h, 24 h, and 72 h.

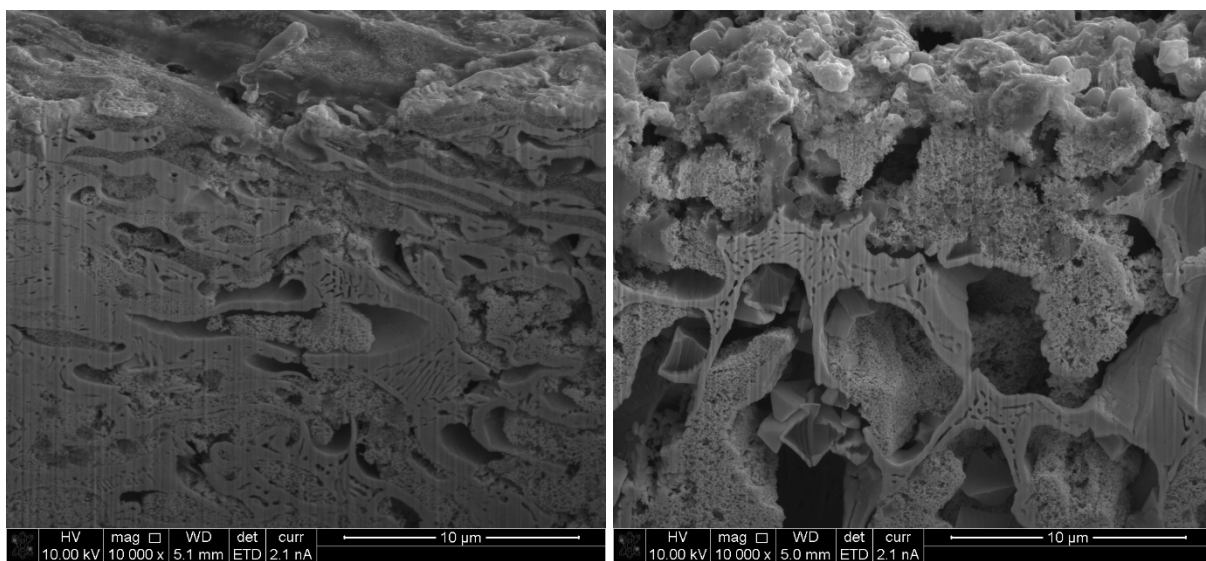

Figure S10: SEM-FIB images of a 24 h chemically dealloyed  $\text{Ag}_{15}\text{Cu}_{85}$  sample before (a) and after (b) MOF deposition.

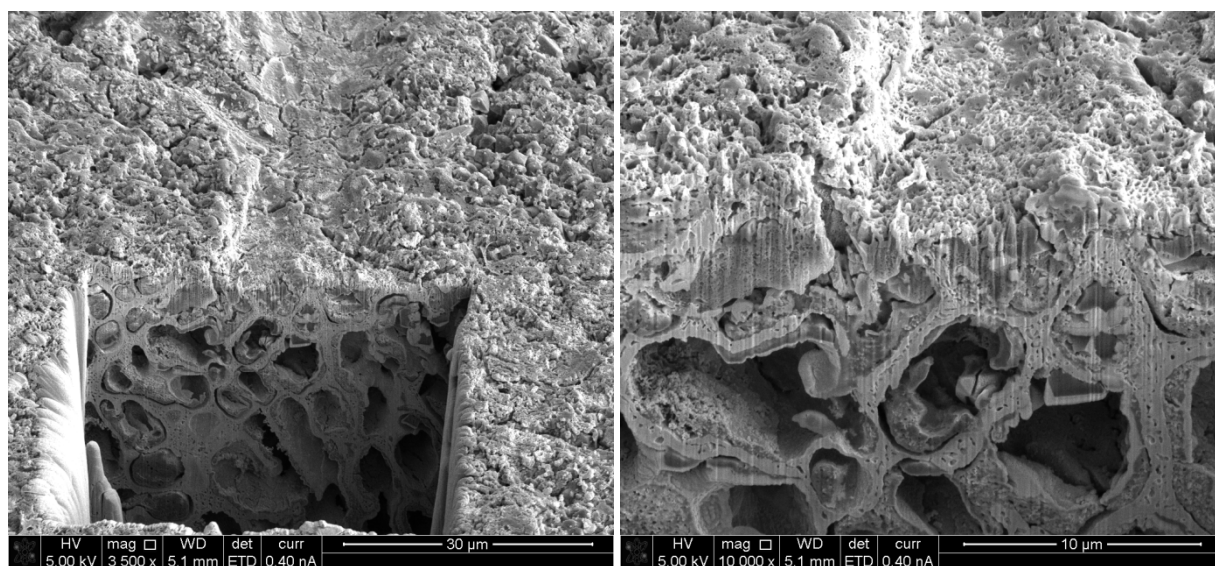

Figure S11: SEM-FIB images of a  $\text{Ag}_{15}\text{Cu}_{85}$  sample dealloyed and deposited with MOF. The sample was scratched in the centre with a diamond pen.

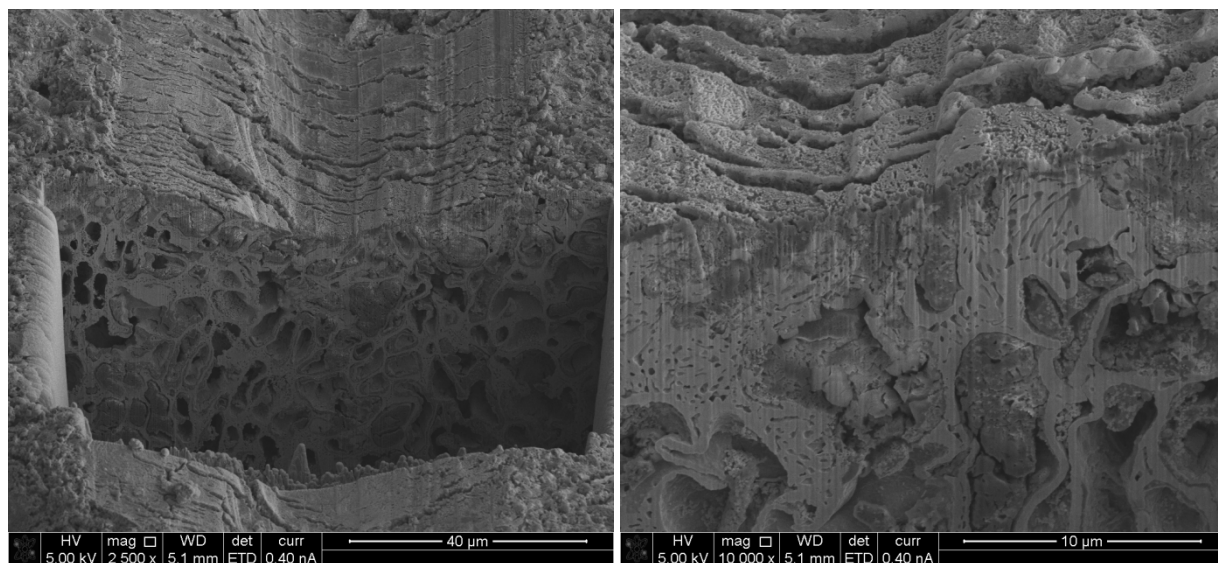

*Figure S12: SEM-FIB images of a  $\text{Ag}_{15}\text{Cu}_{85}$  sample dealloyed and deposited with MOF. The sample was scratched in the centre with a diamond pen (more deeply than the precedent sample).*
